# Supplementary material for: Analysis of Plasma Proteins Involved in Inflammation, Immune Response/Complement System, and Blood Coagulation upon Admission of COVID-19 Patients to Hospital May Help to Predict the Prognosis of the Disease
Source: MDPI journal article supplement (doi:10.3390/cells12121601), 2023-06-10
Supplement: s1 [file s1]

## Supplementary Tables

**Table S1.** Proteins with expression significantly altered in the patients with severe symptoms that were discharged after admission to an intensive care unit (ICU) vs patients with mild symptoms that were discharged without admission to an ICU.

| <sup>a</sup> Accession number | Protein name                                                             | Score | <sup>b</sup> Ratio 2:1 | Anova (p) |
|-------------------------------|--------------------------------------------------------------------------|-------|------------------------|-----------|
| P29353                        | SHC-transforming protein 1                                               | 4     | 3.47                   | 0.03      |
| A6NP61                        | ZAR1-like protein                                                        | 9     | 3.36                   | 0.01      |
| P0DJI8                        | Serum amyloid A-1 protein                                                | 154   | 2.41                   | 0.00      |
| P0DJI9                        | Serum amyloid A-2 protein                                                | 132   | 2.32                   | 0.00      |
| Q15147                        | 1-phosphatidylinositol 4_5-bisphosphate phosphodiesterase beta-4         | 23    | 1.87                   | 0.00      |
| P02741                        | C-reactive protein                                                       | 57    | 1.79                   | 0.01      |
| P01011                        | Alpha-1-antichymotrypsin                                                 | 344   | 1.39                   | 0.00      |
| P02747                        | Complement C1q subcomponent subunit C                                    | 15    | 1.33                   | 0.03      |
| P00734                        | Prothrombin                                                              | 257   | 1.24                   | 0.03      |
| P08603                        | Complement factor H                                                      | 453   | 0.88                   | 0.03      |
| P02774                        | Vitamin D-binding protein                                                | 382   | 0.86                   | 0.04      |
| P19823                        | Inter-alpha-trypsin inhibitor heavy chain H2                             | 272   | 0.83                   | 0.00      |
| P02787                        | Serotransferrin                                                          | 935   | 0.83                   | 0.01      |
| P04217                        | Alpha-1B-glycoprotein                                                    | 251   | 0.80                   | 0.03      |
| O43866                        | CD5 antigen-like                                                         | 70    | 0.80                   | 0.01      |
| Q9NUI1                        | Peroxisomal 2_4-dienoyl-CoA reductase [(3E)-enoyl-CoA-producing]         | 47    | 0.79                   | 0.02      |
| Q9Y2K5                        | R3H domain-containing protein 2                                          | 10    | 0.78                   | 0.04      |
| P02652                        | Apolipoprotein A-II                                                      | 137   | 0.77                   | 0.02      |
| Q86VF2                        | Immunoglobulin-like and fibronectin type III domain-containing protein 1 | 32    | 0.76                   | 0.01      |
| P08697                        | Alpha-2-antiplasmin                                                      | 102   | 0.76                   | 0.03      |
| Q13620                        | Cullin-4B                                                                | 6     | 0.76                   | 0.04      |
| Q5T013                        | Putative hydroxypyruvate isomerase                                       | 15    | 0.75                   | 0.04      |
| Q9BY84                        | Dual specificity protein phosphatase 16                                  | 14    | 0.72                   | 0.03      |
| P06396                        | Gelsolin                                                                 | 60    | 0.67                   | 0.01      |
| O95445                        | Apolipoprotein M                                                         | 11    | 0.67                   | 0.01      |
| P02100                        | Hemoglobin subunit epsilon                                               | 20    | 0.63                   | 0.04      |
| O75161                        | Nephrocystin-4                                                           | 16    | 0.60                   | 0.01      |
| P02654                        | Apolipoprotein C-I                                                       | 12    | 0.56                   | 0.01      |
| P02042                        | Hemoglobin subunit delta                                                 | 95    | 0.52                   | 0.04      |
| Q96TA1                        | Protein Niban 2                                                          | 5     | 0.52                   | 0.02      |
| Q96PD5                        | N-acetylmuramoyl-L-alanine amidase                                       | 6     | 0.45                   | 0.01      |
| P07864                        | L-lactate dehydrogenase C chain                                          | 16    | 0.38                   | 0.04      |

<sup>a</sup>Identification is based on proteins ID from UniProt protein database, reviewed only (<http://www.uniprot.org/>).

<sup>b</sup>Proteins with expression significantly altered are organized according to the ratio.

Group 1: patients with mild symptoms that were discharged without admission to an intensive care unit (ICU)

Group 2: patients with severe symptoms that were discharged after admission to an ICU

**Table S2.** Proteins with expression significantly altered in the critical patients, who admitted to an intensive care unit (ICU) and died vs patients with mild symptoms that were discharged without admission to an intensive care unit (ICU)

| <sup>a</sup> <b>Accession number</b> | <b>Protein name</b>                                              | <b>Score</b> | <sup>b</sup> <b>Ratio 3:1</b> | <b>Anova (p)</b> |
|--------------------------------------|------------------------------------------------------------------|--------------|-------------------------------|------------------|
| P29353                               | SHC-transforming protein 1                                       | 4            | 4.51                          | 0.03             |
| Q15004                               | PCNA-associated factor                                           | 5            | 2.78                          | 0.01             |
| P0DJI9                               | Serum amyloid A-2 protein                                        | 132          | 2.69                          | 0.00             |
| P0DJI8                               | Serum amyloid A-1 protein                                        | 154          | 2.51                          | 0.01             |
| Q15147                               | 1-phosphatidylinositol 4 5-bisphosphate phosphodiesterase beta-4 | 23           | 2.19                          | 0.03             |
| Q8NB12                               | Histone-lysine N-methyltransferase SMYD1                         | 10           | 1.46                          | 0.00             |
| P01011                               | Alpha-1-antichymotrypsin                                         | 344          | 1.40                          | 0.00             |
| P01009                               | Alpha-1-antitrypsin                                              | 560          | 1.39                          | 0.00             |
| P02750                               | Leucine-rich alpha-2-glycoprotein                                | 112          | 1.36                          | 0.04             |
| Q5JU85                               | IQ motif and SEC7 domain-containing protein 2                    | 37           | 1.29                          | 0.03             |
| P04003                               | C4b-binding protein alpha chain                                  | 183          | 0.86                          | 0.03             |
| O43866                               | CD5 antigen-like                                                 | 70           | 0.84                          | 0.03             |
| Q03591                               | Complement factor H-related protein 1                            | 28           | 0.84                          | 0.02             |
| P19823                               | Inter-alpha-trypsin inhibitor heavy chain H2                     | 272          | 0.82                          | 0.00             |
| Q9UHL0                               | ATP-dependent RNA helicase DDX25                                 | 11           | 0.81                          | 0.02             |
| P02787                               | Serotransferrin                                                  | 935          | 0.80                          | 0.01             |
| P57771                               | Regulator of G-protein signaling 8                               | 8            | 0.80                          | 0.03             |
| P02749                               | Beta-2-glycoprotein 1                                            | 157          | 0.78                          | 0.04             |
| P01008                               | Antithrombin-III                                                 | 121          | 0.76                          | 0.04             |
| P02774                               | Vitamin D-binding protein                                        | 382          | 0.75                          | 0.00             |
| P02765                               | Alpha-2-HS-glycoprotein                                          | 190          | 0.70                          | 0.01             |
| P69892                               | Hemoglobin subunit gamma-2                                       | 30           | 0.68                          | 0.03             |
| Q15195                               | Plasminogen-like protein A                                       | 6            | 0.67                          | 0.01             |
| Q96PD5                               | N-acetylmuramoyl-L-alanine amidase                               | 6            | 0.63                          | 0.02             |
| P02655                               | Apolipoprotein C-II                                              | 23           | 0.60                          | 0.00             |
| P02652                               | Apolipoprotein A-II                                              | 137          | 0.56                          | 0.00             |
| P27169                               | Serum paraoxonase/arylesterase 1                                 | 22           | 0.51                          | 0.04             |
| O95445                               | Apolipoprotein M                                                 | 11           | 0.46                          | 0.00             |
| P53367                               | Arfaptin-1                                                       | 5            | 0.41                          | 0.00             |
| Q9Y2R4                               | Probable ATP-dependent RNA helicase DDX52                        | 4            | 0.14                          | 0.01             |

<sup>a</sup>Identification is based on proteins ID from UniProt protein database, reviewed only (<http://www.uniprot.org/>).

<sup>b</sup>Proteins with expression significantly altered are organized according to the ratio.  
Group 1: patients with mild symptoms that were discharged without admission to an intensive care unit (ICU)

Group 3: critical patients, who were admitted to an ICU and died

**Table S3.** Proteins with expression significantly altered in the critical patients, who admitted to an intensive care unit (ICU) and died vs patients with severe symptoms that were discharged after admission to an ICU

| <sup>a</sup> <b>Acession number</b> | <b>Protein name</b>                    | <b>Score</b> | <sup>b</sup> <b>Ratio 3:2</b> | <b>Anova (p)</b> |
|-------------------------------------|----------------------------------------|--------------|-------------------------------|------------------|
| O00175                              | C-C motif chemokine 24                 | 6            | 1.58                          | 0.04             |
| Q9UMR7                              | C-type lectin domain family 4 member A | 8            | 1.49                          | 0.02             |
|                                     | IQ motif and SEC7 domain-containing    |              | 1.33                          | 0.04             |
| Q5JU85                              | protein 2                              | 37           |                               |                  |
| P01023                              | Alpha-2-macroglobulin                  | 1155         | 1.29                          | 0.02             |
| P04004                              | Vitronectin                            | 152          | 0.85                          | 0.04             |
| P01042                              | Kininogen-1                            | 206          | 0.85                          | 0.04             |
| P02652                              | Apolipoprotein A-II                    | 137          | 0.72                          | 0.01             |
| P22792                              | Carboxypeptidase N subunit 2           | 5            | 0.32                          | 0.01             |
| P53367                              | Arfaptin-1                             | 5            | 0.26                          | 0.00             |
| Q8NGE7                              | Olfactory receptor 9K2                 | 5            | 0.12                          | 0.04             |

<sup>a</sup>Identification is based on proteins ID from UniProt protein database, reviewed only (<http://www.uniprot.org/>).

<sup>b</sup>Proteins with expression significantly altered are organized according to the ratio.

Group 2: patients with severe symptoms that were discharged after admission to an ICU

Group 3: critical patients, who were admitted to an ICU and died
